# Supplementary material for: A diapause pathway underlies the gyne phenotype inPolisteswasps, revealing an evolutionary route to caste-containing insect societies
Source: HighWire-hosted journal article supplement (doi:10.1073/pnas.0705660104), 2007-08-18
Supplement: 05660Fig6.pdf [file 05660Fig6.pdf]

# Identified proteins

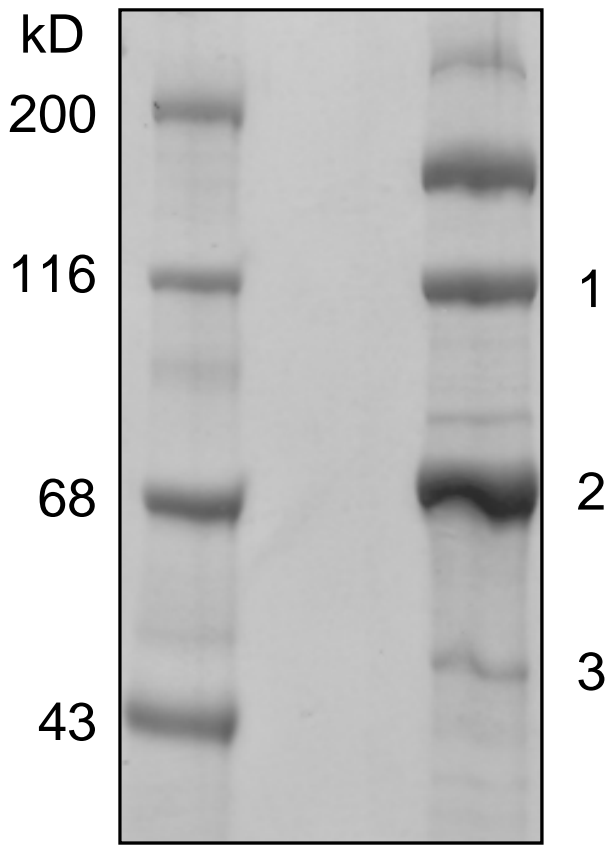

| Band | Proteins                                                                                              |
|------|-------------------------------------------------------------------------------------------------------|
| 1    | ATP citrate lyase                                                                                     |
| 2    | Hexamerin                                                                                             |
| 3    | Aldehyde dehydrogenase, tubulin, eEF-1, udp glucose pyrophosphorylase, Imaginal disc growth factor 4. |

See SI Table 6 for additional information
